# Supplementary material for: Derived Neutrophil-Lymphocyte Ratio and C-Reactive Protein as Prognostic Factors for Early-Stage Non-Small Cell Lung Cancer Treated with Stereotactic Body Radiation Therapy
Source: MDPI journal article supplement (doi:10.3390/diagnostics13020313), 2023-01-14
Supplement: s1 [file s1]

**Supplement Figure S1** Pre-treatment distribution of white blood cells (WBC), neutrophils, lymphocytes, monocytes, platelets, albumin, LDH, and CRP.

**Supplement Figure S2** Receiver operating characteristic curves for OS of dNLR, MLR, PLR, albumin, LDH, and CRP.

**Supplement Figure S3** Kaplan–Meier curves for LRR and PFS, stratified by CRP group.

**Supplement Figure S4** Boxplot of pre- and post-SBRT WBC, neutrophils, lymphocytes, dNLR, albumin, LDH, and CRP.

**Supplement Figure S5** Kaplan–Meier curves for cancer-specific survival, stratified by baseline dNLR and CRP group, respectively.

**Supplement Figure S6** Kaplan–Meier curves for OS, stratified by Group 1, 2 and 3, respectively.
