# Supplementary material for: Derived Neutrophil-Lymphocyte Ratio and C-Reactive Protein as Prognostic Factors for Early-Stage Non-Small Cell Lung Cancer Treated with Stereotactic Body Radiation Therapy
Source: MDPI journal article supplement (doi:10.3390/diagnostics13020313), 2023-01-14
Supplement: s1 [file s1]

**Supplement Table S1.** Cox proportional hazards regression for LRR.

| Covariables                      | Univariable Analysis  |                  | Multivariable Analysis |                  |
|----------------------------------|-----------------------|------------------|------------------------|------------------|
|                                  | Hazard Ratio (95% CI) | P value          | Hazard Ratio (95% CI)  | P value          |
| <b>Age (year)</b>                | 1.01 (0.97–1.06)      | 0.623            | 1.02 (0.97–1.07)       | 0.506            |
| <b>Gender</b>                    |                       |                  |                        |                  |
| Female                           | 1 [Reference]         |                  | 1 [Reference]          |                  |
| Male                             | 2.60 (0.89–7.59)      | 0.080            | 2.01 (0.43–9.42)       | 0.374            |
| <b>Smoking Status</b>            |                       |                  |                        |                  |
| Never smoker                     | 1 [Reference]         |                  | 1 [Reference]          |                  |
| Former/current smoker            | 1.96 (0.82–4.71)      | 0.130            | 1.27 (0.37–4.34)       | 0.699            |
| <b>T-stage</b>                   |                       |                  |                        |                  |
| T1                               | 1 [Reference]         |                  | 1 [Reference]          |                  |
| T2                               | 0.77 (0.35–1.71)      | 0.518            | 0.49 (0.21–1.14)       | 0.099            |
| <b>Histologic subtype</b>        |                       |                  |                        |                  |
| Adenocarcinoma                   | 1 [Reference]         |                  | 1 [Reference]          |                  |
| Squamous cell carcinoma          | 1.88 (0.68–5.20)      | 0.223            | 0.66 (0.20–2.25)       | 0.509            |
| NSCLC, NOS                       | 0.81 (0.21–3.09)      | 0.762            | 0.28 (0.06–1.19)       | 0.083            |
| No pathologic diagnosis          | 0.82 (0.30–2.25)      | 0.696            | 0.55 (0.18–1.72)       | 0.304            |
| <b>BED (Gy)</b>                  | 0.96 (0.90–1.02)      | 0.221            | 0.91 (0.85–0.98)       | <b>0.011</b>     |
| <b>dNLR</b>                      |                       |                  |                        |                  |
| <1.4                             | 1 [Reference]         |                  |                        |                  |
| ≥1.4                             | 1.12 (0.48–2.60)      | 0.791            |                        |                  |
| <b>MLR</b>                       |                       |                  |                        |                  |
| <0.3                             | 1 [Reference]         |                  | 1 [Reference]          | 0.171            |
| ≥0.3                             | 2.36 (0.94–5.91)      | 0.067            | 2.00 (0.74–5.37)       |                  |
| <b>PLR</b>                       |                       |                  |                        |                  |
| <128                             | 1 [Reference]         |                  |                        |                  |
| ≥128                             | 0.73 (0.33–1.61)      | 0.435            |                        |                  |
| <b>Serum albumin level (g/L)</b> |                       |                  |                        |                  |
| <43.0                            | 1 [Reference]         |                  |                        |                  |
| ≥43.0                            | 0.57 (0.25–1.33)      | 0.195            |                        |                  |
| <b>LDH (U/L)</b>                 |                       |                  |                        |                  |
| <240                             | 1 [Reference]         |                  |                        |                  |
| ≥240                             | 0.04 (0.00–21.82)     | 0.323            |                        |                  |
| <b>CRP</b>                       |                       |                  |                        |                  |
| <2.9                             | 1 [Reference]         |                  | 1 [Reference]          |                  |
| ≥2.9                             | 10.87 (3.73–31.72)    | <b>&lt;0.001</b> | 17.17 (5.56–53.08)     | <b>&lt;0.001</b> |

**Supplement Table S2.** Cox proportional hazards regression for DM.

| Covariables                      | Univariable Analysis  |              | Multivariable Analysis |              |
|----------------------------------|-----------------------|--------------|------------------------|--------------|
|                                  | Hazard Ratio (95% CI) | P value      | Hazard Ratio (95% CI)  | P value      |
| <b>Age (year)</b>                | 1.01 (0.97–1.05)      | 0.639        | 1.01 (0.97–1.05)       | 0.605        |
| <b>Gender</b>                    |                       |              |                        |              |
| Female                           | 1 [Reference]         |              | 1 [Reference]          |              |
| Male                             | 1.98 (0.91–4.29)      | 0.084        | 1.76 (0.64–4.79)       | 0.271        |
| <b>Smoking Status</b>            |                       |              |                        |              |
| Never smoker                     | 1 [Reference]         |              | 1 [Reference]          |              |
| Former/current smoker            | 1.65 (0.85–3.19)      | 0.137        | 0.90 (0.37–2.16)       | 0.810        |
| <b>T-stage</b>                   |                       |              |                        |              |
| T1                               | 1 [Reference]         |              | 1 [Reference]          |              |
| T2                               | 0.85 (0.46–1.58)      | 0.604        | 0.68 (0.35–1.30)       | 0.243        |
| <b>Histologic subtype</b>        |                       |              |                        |              |
| Adenocarcinoma                   | 1 [Reference]         |              | 1 [Reference]          |              |
| Squamous cell carcinoma          | 2.25 (1.03–4.95)      | <b>0.043</b> | 1.50 (0.63–3.55)       | 0.362        |
| NSCLC, NOS                       | 0.90 (0.32–2.57)      | 0.847        | 0.55 (0.18–1.65)       | 0.285        |
| No pathologic diagnosis          | 0.85 (0.38–1.93)      | 0.700        | 0.81 (0.35–1.88)       | 0.616        |
| <b>BED (Gy)</b>                  | 0.91 (0.86–0.97)      | <b>0.004</b> | 0.90 (0.84–0.97)       | <b>0.003</b> |
| <b>dNLR</b>                      |                       |              |                        |              |
| <1.4                             | 1 [Reference]         |              | 1 [Reference]          |              |
| ≥1.4                             | 2.00 (0.95–4.23)      | 0.068        | 2.05 (0.95–4.45)       | 0.069        |
| <b>MLR</b>                       |                       |              |                        |              |
| <0.3                             | 1 [Reference]         |              |                        |              |
| ≥0.3                             | 1.13 (0.60–2.12)      | 0.705        |                        |              |
| <b>PLR</b>                       |                       |              |                        |              |
| <128                             | 1 [Reference]         |              |                        |              |
| ≥128                             | 0.76 (0.41–1.40)      | 0.375        |                        |              |
| <b>Serum albumin level (g/L)</b> |                       |              |                        |              |
| <43.0                            | 1 [Reference]         |              |                        |              |
| ≥43.0                            | 0.67 (0.35–1.28)      | 0.224        |                        |              |
| <b>LDH (U/L)</b>                 |                       |              |                        |              |
| <240                             | 1 [Reference]         |              |                        |              |
| ≥240                             | 0.52 (0.13–2.17)      | 0.371        |                        |              |
| <b>CRP</b>                       |                       |              |                        |              |
| <2.9                             | 1 [Reference]         |              | 1 [Reference]          |              |
| ≥2.9                             | 1.80 (0.98–3.33)      | 0.191        | 1.97 (1.04–3.72)       | <b>0.038</b> |

**Supplement Table S3.** Cox proportional hazards regression for PFS.

| Covariables                       | Univariable Analysis  |              | Multivariable Analysis |                  |
|-----------------------------------|-----------------------|--------------|------------------------|------------------|
|                                   | Hazard Ratio (95% CI) | P value      | Hazard Ratio (95% CI)  | P value          |
| <b>Age (year)</b>                 | 1.01 (0.98–1.05)      | 0.464        | 1.01 (0.97–1.06)       | 0.597            |
| <b>Gender</b>                     |                       |              |                        |                  |
| Female                            | 1 [Reference]         |              | 1 [Reference]          |                  |
| Male                              | 2.23 (1.08–4.60)      | <b>0.030</b> | 1.74 (0.64–4.75)       | 0.282            |
| <b>ECOG PS</b>                    |                       |              |                        |                  |
| 0                                 | 1 [Reference]         |              | 1 [Reference]          |                  |
| 1                                 | 1.40 (0.69–2.85)      | 0.348        | 1.52 (0.70–3.32)       | 0.297            |
| 2–3                               | 0.74 (0.27–2.05)      | 0.566        | 0.87 (0.26–2.84)       | 0.812            |
| <b>Charlson Comorbidity Index</b> |                       |              |                        |                  |
| 2                                 | 1 [Reference]         |              | 1 [Reference]          |                  |
| 3–4                               | 1.16 (0.65–2.07)      | 0.627        | 0.83 (0.45–1.55)       | 0.563            |
| ≥5                                | 1.29 (0.44–3.77)      | 0.645        | 0.52 (0.16–1.72)       | 0.285            |
| <b>Smoking Status</b>             |                       |              |                        |                  |
| Never smoker                      | 1 [Reference]         |              | 1 [Reference]          |                  |
| Former/current smoker             | 1.99 (1.07–3.69)      | <b>0.030</b> | 1.13 (0.48–2.67)       | 0.785            |
| <b>Pulmonary Function</b>         |                       |              |                        |                  |
| Normal                            | 1 [Reference]         |              | 1 [Reference]          |                  |
| Mild                              | 0.70 (0.20–2.50)      | 0.584        | 0.61 (0.15–2.48)       | 0.492            |
| Moderate                          | 1.67 (0.60–4.59)      | 0.324        | 0.97 (0.31–2.97)       | 0.952            |
| Severe                            | 1.47 (0.57–3.76)      | 0.422        | 0.90 (0.32–2.55)       | 0.846            |
| Unknown                           | 1.63 (0.63–4.26)      | 0.315        | 1.39 (0.47–4.06)       | 0.550            |
| <b>T-stage</b>                    |                       |              |                        |                  |
| T1                                | 1 [Reference]         |              | 1 [Reference]          |                  |
| T2                                | 0.78 (0.44–1.36)      | 0.379        | 0.65 (0.35–1.21)       | 0.175            |
| <b>Histologic subtype</b>         |                       |              |                        |                  |
| Adenocarcinoma                    | 1 [Reference]         |              | 1 [Reference]          |                  |
| Squamous cell carcinoma           | 2.42 (1.15–5.09)      | <b>0.020</b> | 1.28 (0.53–3.08)       | 0.590            |
| NSCLC, NOS                        | 1.16 (0.46–2.92)      | 0.749        | 0.63 (0.23–1.74)       | 0.369            |
| No pathologic diagnosis           | 1.08 (0.51–2.26)      | 0.849        | 0.89 (0.39–2.03)       | 0.780            |
| <b>BED (Gy)</b>                   | 0.92 (0.87–0.97)      | <b>0.002</b> | 0.89 (0.84–0.94)       | <b>&lt;0.001</b> |
| <b>dNLR</b>                       |                       |              |                        |                  |
| <1.4                              | 1 [Reference]         |              | 1 [Reference]          |                  |
| ≥1.4                              | 1.77 (0.92–3.41)      | 0.086        | 1.85 (0.89–3.87)       | 0.100            |
| <b>MLR</b>                        |                       |              |                        |                  |
| <0.3                              | 1 [Reference]         |              |                        |                  |
| ≥0.3                              | 1.32 (0.74–2.35)      | 0.345        |                        |                  |
| <b>PLR</b>                        |                       |              |                        |                  |
| <128                              | 1 [Reference]         |              |                        |                  |
| ≥128                              | 0.82 (0.47–1.43)      | 0.487        |                        |                  |
| <b>Serum albumin level (g/L)</b>  |                       |              |                        |                  |
| <43.0                             | 1 [Reference]         |              | 1 [Reference]          |                  |
| ≥43.0                             | 0.60 (0.33–1.10)      | 0.097        | 0.86 (0.44–1.66)       | 0.644            |
| <b>LDH (U/L)</b>                  |                       |              |                        |                  |
| <240                              | 1 [Reference]         |              |                        |                  |
| ≥240                              | 0.42 (0.10–1.74)      | 0.233        |                        |                  |
| <b>CRP</b>                        |                       |              |                        |                  |
| <2.9                              | 1 [Reference]         |              | 1 [Reference]          |                  |
| ≥2.9                              | 1.51 (0.82–2.79)      | 0.191        | 3.13 (1.63–6.01)       | <b>0.001</b>     |

**Supplement Table S4.** Cox proportional hazards regression for cancer-specific survival.

| Covariables                       | Univariable Analysis  |              | Multivariable Analysis |              |
|-----------------------------------|-----------------------|--------------|------------------------|--------------|
|                                   | Hazard Ratio (95% CI) | P value      | Hazard Ratio (95% CI)  | P value      |
| <b>Age (year)</b>                 | 1.03 (0.98–1.07)      | 0.288        | 1.01 (0.95–1.07)       | 0.864        |
| <b>Gender</b>                     |                       |              |                        |              |
| Female                            | 1 [Reference]         |              | 1 [Reference]          |              |
| Male                              | 4.20 (1.27–13.87)     | <b>0.019</b> | 2.67 (0.55–13.04)      | 0.224        |
| <b>ECOG PS</b>                    |                       |              |                        |              |
| 0                                 | 1 [Reference]         |              | 1 [Reference]          |              |
| 1                                 | 2.20 (0.75–6.41)      | 0.149        | 2.76 (0.85–9.03)       | 0.093        |
| 2–3                               | 1.42 (0.36–5.70)      | 0.618        | 1.84 (0.35–9.69)       | 0.474        |
| <b>Charlson Comorbidity Index</b> |                       |              |                        |              |
| 2                                 | 1 [Reference]         |              | 1 [Reference]          |              |
| 3–4                               | 1.39 (0.63–3.07)      | 0.410        | 1.12 (0.47–2.67)       | 0.796        |
| ≥5                                | 1.91 (0.53–6.95)      | 0.325        | 0.98 (0.23–4.15)       | 0.978        |
| <b>Smoking Status</b>             |                       |              |                        |              |
| Never smoker                      | 1 [Reference]         |              | 1 [Reference]          |              |
| Former/current smoker             | 2.86 (1.17–7.04)      | <b>0.022</b> | 1.12 (0.34–3.64)       | 0.854        |
| <b>Pulmonary Function</b>         |                       |              |                        |              |
| Normal                            | 1 [Reference]         |              | 1 [Reference]          |              |
| Mild                              | 0.38 (0.04–3.70)      | 0.408        | 0.28 (0.02–3.18)       | 0.301        |
| Moderate                          | 2.48 (0.64–9.62)      | 0.189        | 0.71 (0.15–3.35)       | 0.669        |
| Severe                            | 1.86 (0.51–6.78)      | 0.344        | 0.73 (0.17–3.21)       | 0.682        |
| Unknown                           | 1.76 (0.47–6.62)      | 0.406        | 1.29 (0.30–5.53)       | 0.729        |
| <b>T-stage</b>                    |                       |              |                        |              |
| T1                                | 1 [Reference]         |              |                        |              |
| T2                                | 1.46 (0.70–3.03)      | 0.313        | 1.31 (0.58–2.96)       | 0.511        |
| <b>Histologic subtype</b>         |                       |              |                        |              |
| Adenocarcinoma                    | 1 [Reference]         |              |                        |              |
| Squamous cell carcinoma           | 2.69 (1.00–7.24)      | <b>0.050</b> | 1.13 (0.37–3.48)       | 0.828        |
| NSCLC, NOS                        | 1.41 (0.41–4.83)      | 0.580        | 1.06 (0.26–4.27)       | 0.934        |
| No pathologic diagnosis           | 1.27 (0.47–3.41)      | 0.639        | 1.22 (0.41–3.64)       | 0.723        |
| <b>BED (Gy)</b>                   | 0.92 (0.85–0.99)      | <b>0.020</b> | 0.88 (0.81–0.96)       | <b>0.004</b> |
| <b>dNLR</b>                       |                       |              |                        |              |
| <1.4                              | 1 [Reference]         |              |                        |              |
| ≥1.4                              | 3.23 (1.12–9.29)      | <b>0.030</b> | 4.02 (1.25–12.96)      | <b>0.020</b> |
| <b>MLR</b>                        |                       |              |                        |              |
| <0.3                              | 1 [Reference]         |              |                        |              |
| ≥0.3                              | 1.39 (0.65–3.00)      | 0.397        |                        |              |
| <b>PLR</b>                        |                       |              |                        |              |
| <128                              | 1 [Reference]         |              |                        |              |
| ≥128                              | 0.88 (0.42–1.82)      | 0.722        |                        |              |
| <b>Serum albumin level (g/L)</b>  |                       |              |                        |              |
| <43.0                             | 1 [Reference]         |              |                        |              |
| ≥43.0                             | 0.48 (0.21–1.07)      | <b>0.073</b> | 0.66 (0.25–1.73)       | 0.394        |
| <b>LDH (U/L)</b>                  |                       |              |                        |              |
| <240                              | 1 [Reference]         |              |                        |              |
| ≥240                              | 0.87 (0.21–3.65)      | 0.846        |                        |              |
| <b>CRP</b>                        |                       |              |                        |              |
| <2.9                              | 1 [Reference]         |              |                        |              |
| ≥2.9                              | 2.30 (1.10–4.77)      | <b>0.026</b> | 2.87 (1.21–6.80)       | <b>0.017</b> |
