# Supplementary material for: Derived Neutrophil-Lymphocyte Ratio and C-Reactive Protein as Prognostic Factors for Early-Stage Non-Small Cell Lung Cancer Treated with Stereotactic Body Radiation Therapy
Source: Diagnostics (Basel). 2023 Jan 14;13(2):313. doi: 10.3390/diagnostics13020313 (PMC9857614; doi:10.3390/diagnostics13020313)
Supplement: Supplementary file 1 [file diagnostics-13-00313-s001.zip]

Archive with 8 entries (8 files):
- diagnostics-2114750-supplementary/Supplement Figure Legends.pdf
- diagnostics-2114750-supplementary/Supplement Figure S1.pdf
- diagnostics-2114750-supplementary/Supplement Figure S2.pdf
- diagnostics-2114750-supplementary/Supplement Figure S3.pdf
- diagnostics-2114750-supplementary/Supplement Figure S4.pdf
- diagnostics-2114750-supplementary/Supplement Figure S5.pdf
- diagnostics-2114750-supplementary/Supplement Figure S6.pdf
- diagnostics-2114750-supplementary/Supplement Tables.pdf
