# Supplementary figures and images for: Derived Neutrophil-Lymphocyte Ratio and C-Reactive Protein as Prognostic Factors for Early-Stage Non-Small Cell Lung Cancer Treated with Stereotactic Body Radiation Therapy
Source: MDPI journal article supplement (doi:10.3390/diagnostics13020313), 2023-01-14

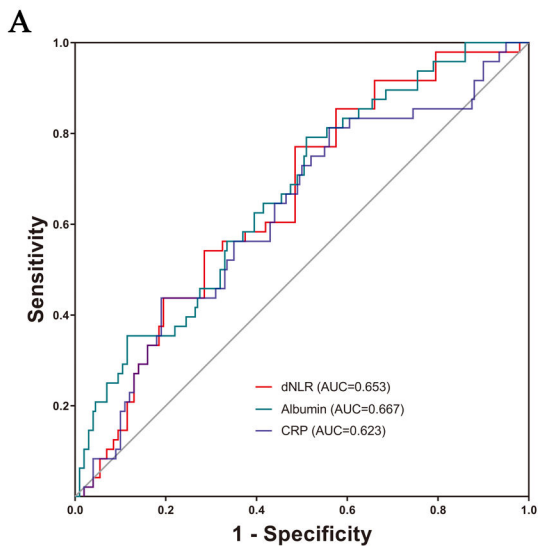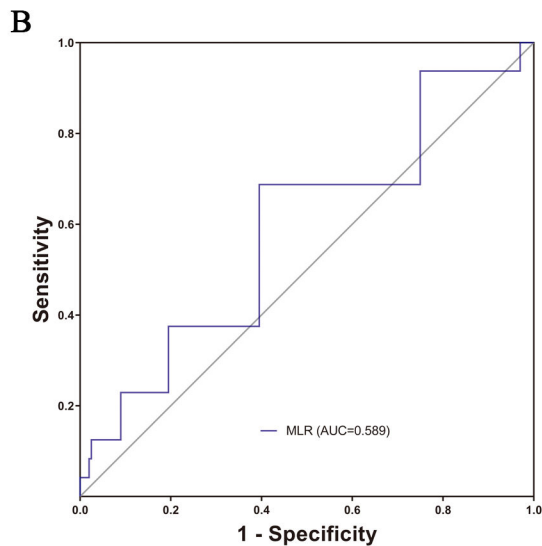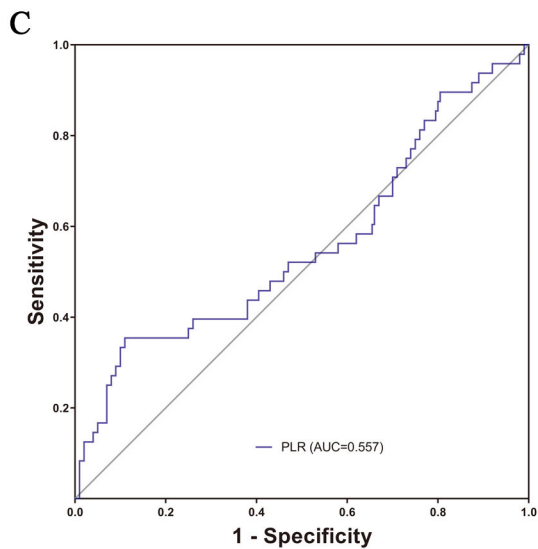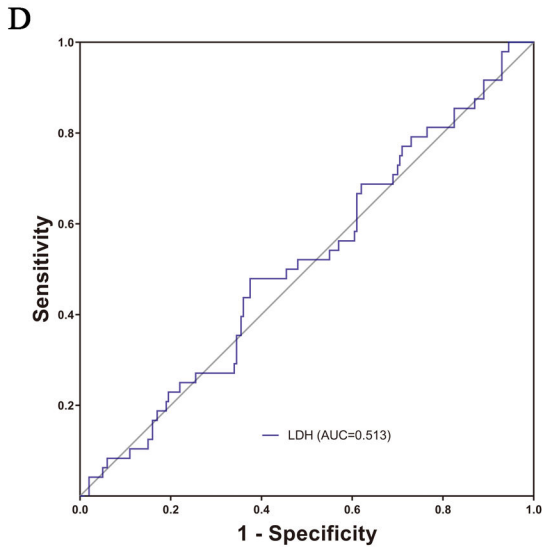

Supplement: s1 [file s1]

A

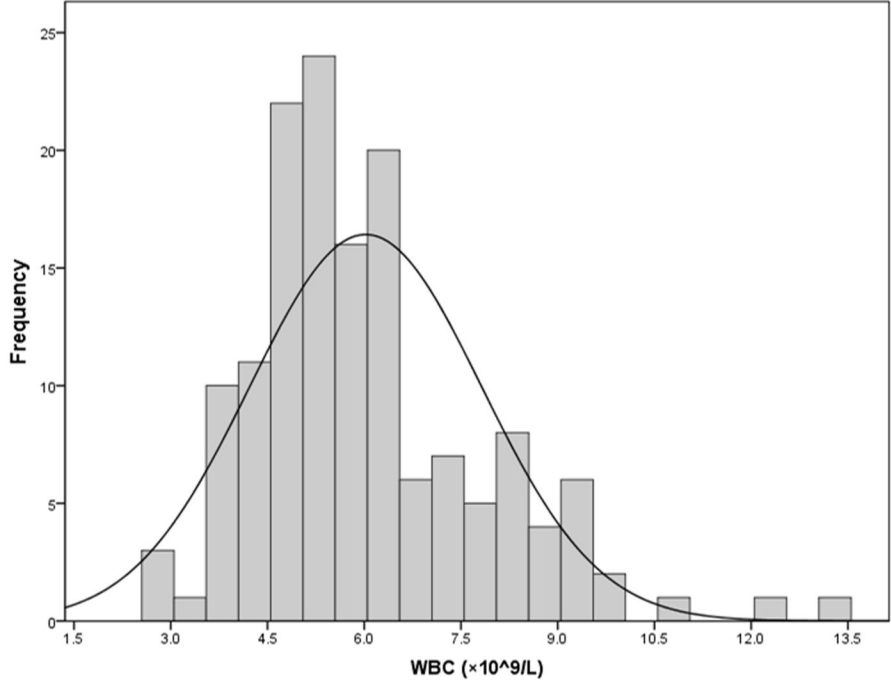

B

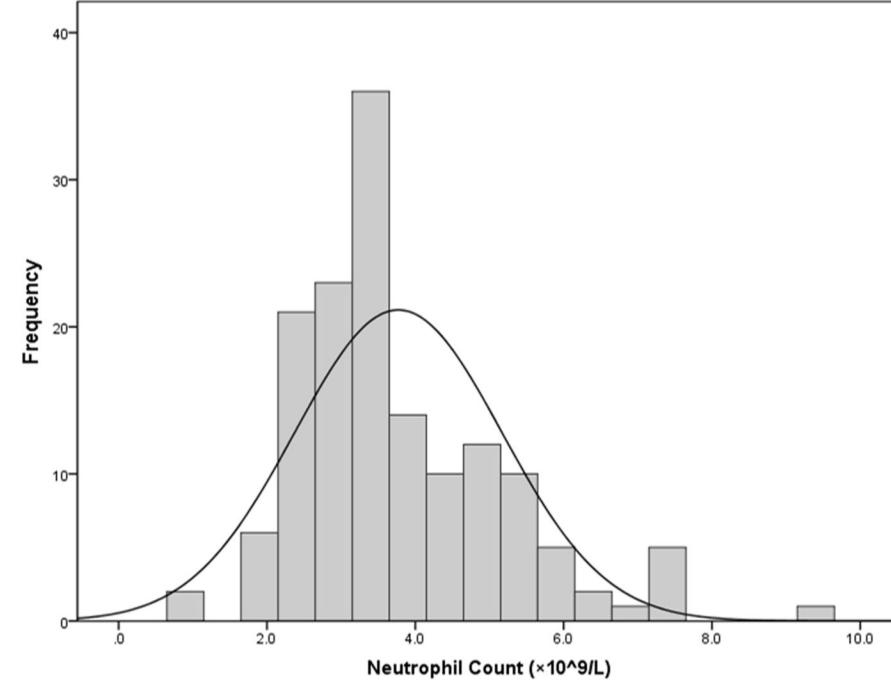

C

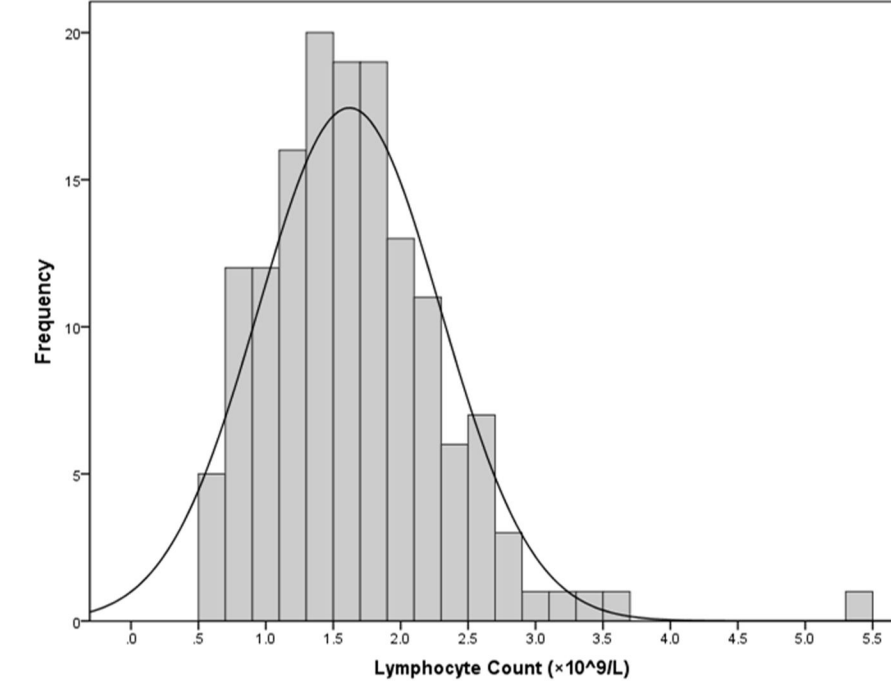

D

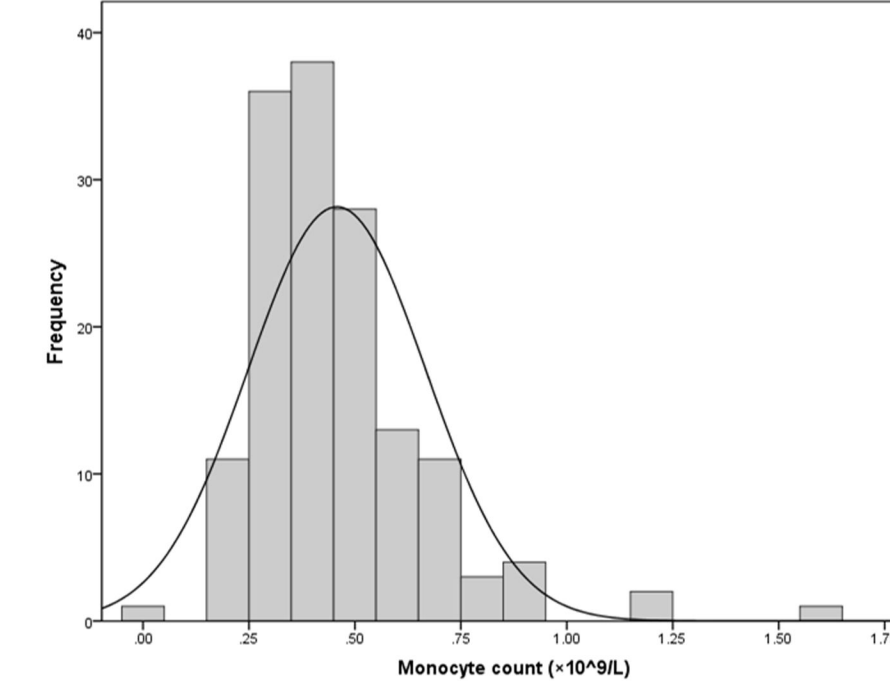

E

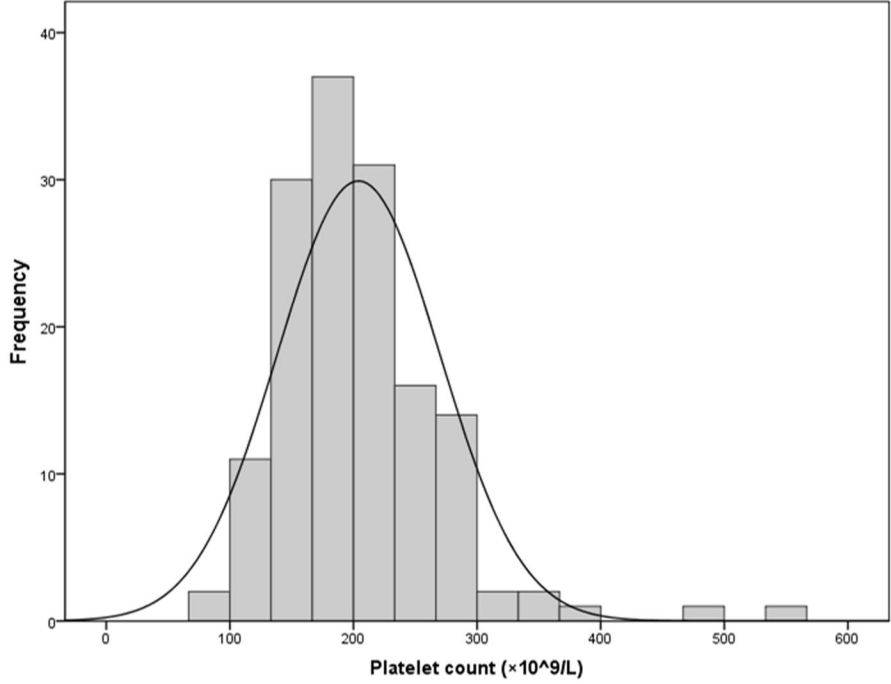

F

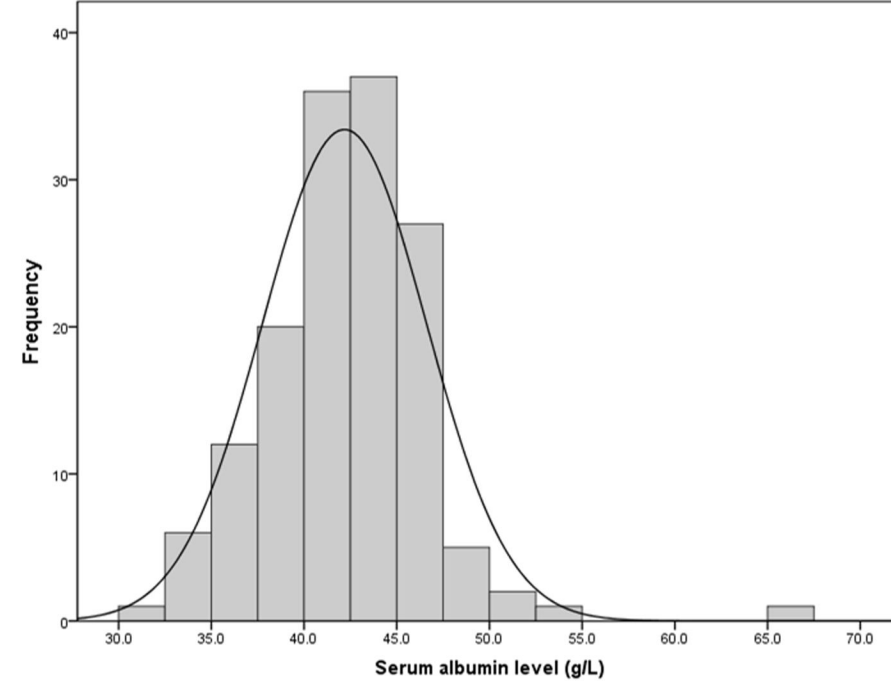

G

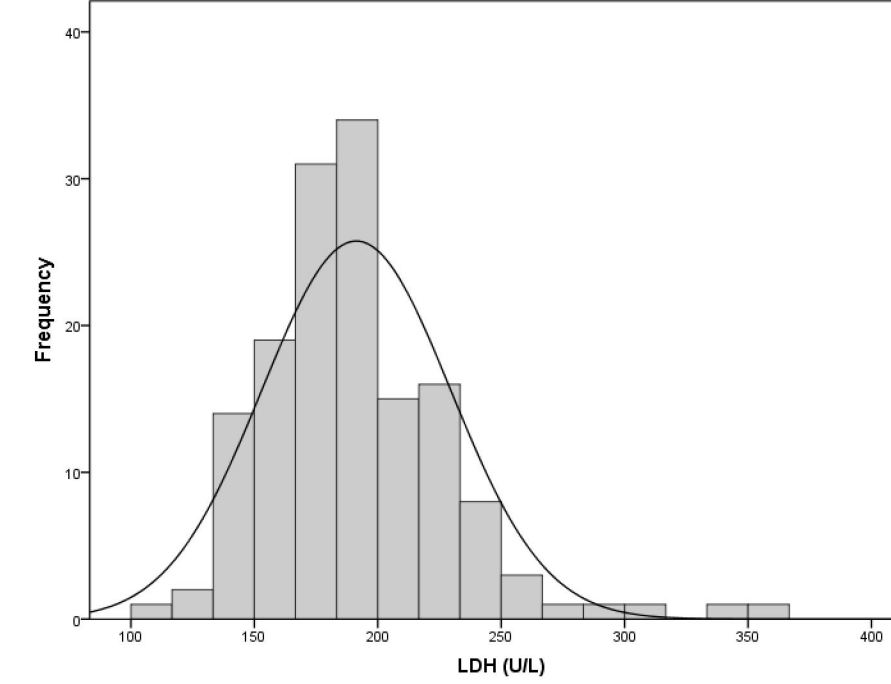

H

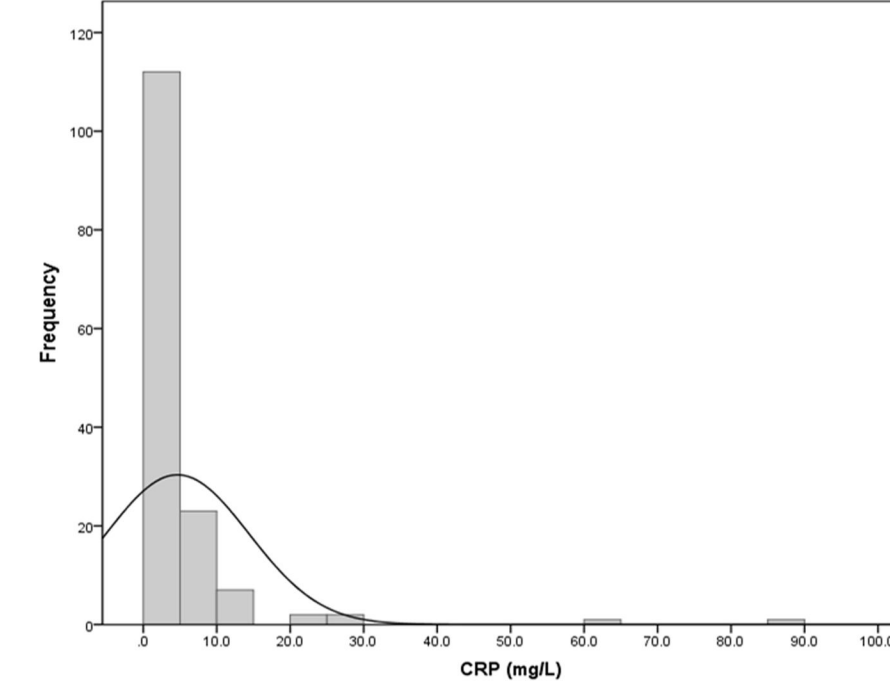

Supplement: s1 [file s1]

A

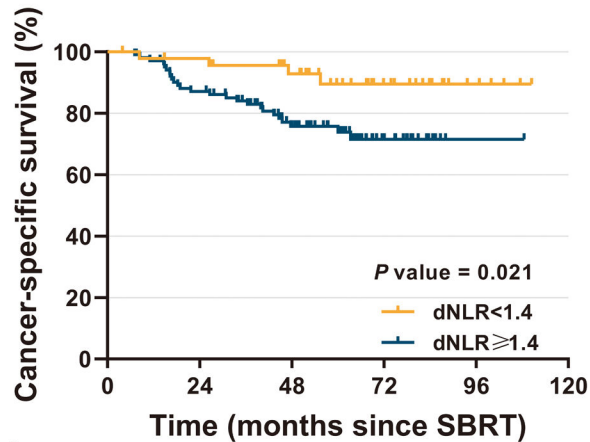

| No. at risk     |     |    |    |    |   |   |
|-----------------|-----|----|----|----|---|---|
| dNLR < 1.4      | 46  | 44 | 35 | 19 | 6 | 1 |
| dNLR $\geq$ 1.4 | 102 | 88 | 55 | 17 | 2 | 1 |

B

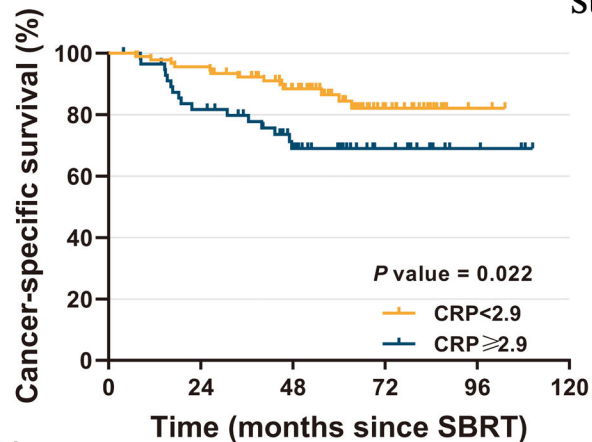

| No. at risk    |    |    |    |    |   |   |
|----------------|----|----|----|----|---|---|
| CRP < 2.9      | 91 | 87 | 60 | 21 | 3 | 1 |
| CRP $\geq$ 2.9 | 57 | 45 | 30 | 15 | 5 | 1 |

Supplement: s1 [file s1]

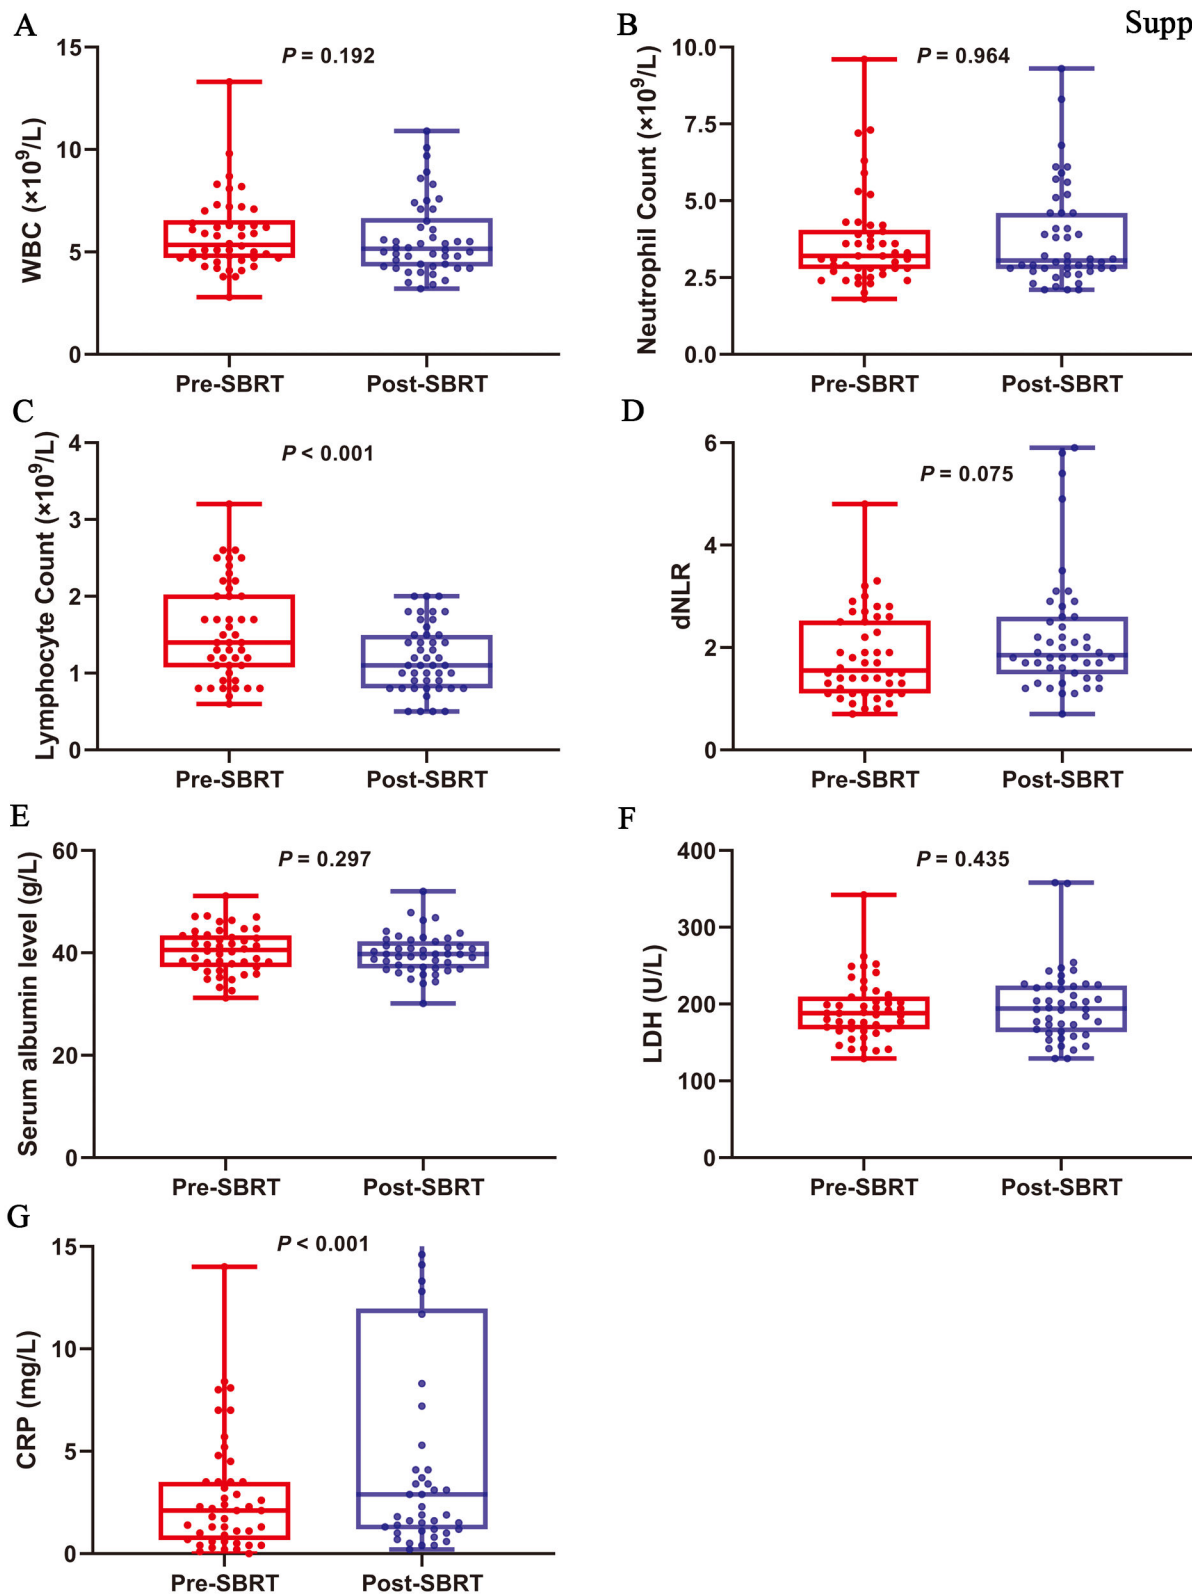

Supplement: s1 [file s1]

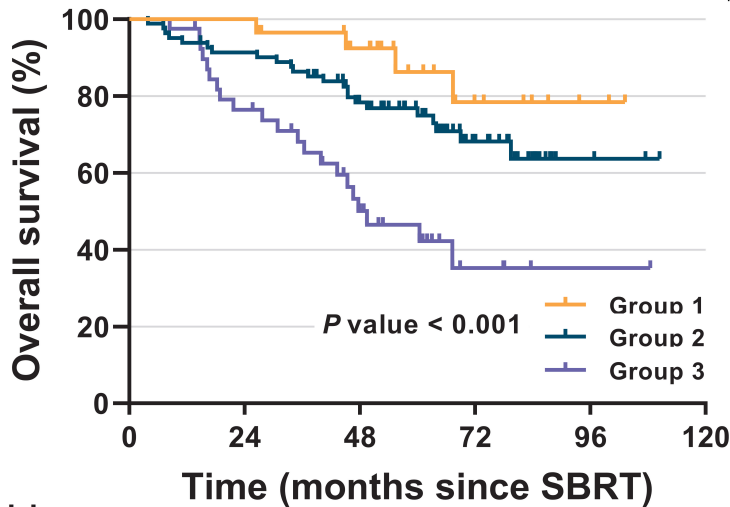

No. at risk

|         |    |    |    |    |   |   |
|---------|----|----|----|----|---|---|
| Group 1 | 28 | 28 | 21 | 9  | 3 | 1 |
| Group 2 | 81 | 74 | 54 | 23 | 4 | 1 |
| Group 3 | 39 | 30 | 16 | 5  | 2 | 1 |

Supplement: s1 [file s1]

A

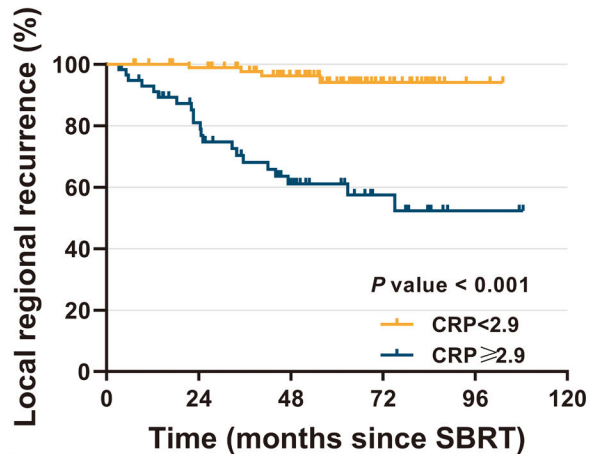

B

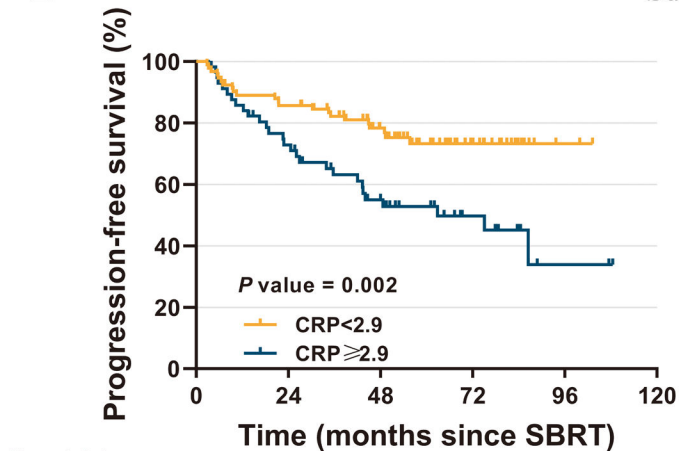

|             |    |    |    |    |   |   |
|-------------|----|----|----|----|---|---|
| No. at risk |    |    |    |    |   |   |
| CRP < 2.9   | 91 | 86 | 59 | 20 | 3 | 1 |
| CRP ≥ 2.9   | 57 | 41 | 25 | 12 | 3 | 1 |

|             |    |    |    |    |   |   |
|-------------|----|----|----|----|---|---|
| No. at risk |    |    |    |    |   |   |
| CRP < 2.9   | 91 | 78 | 52 | 20 | 3 | 1 |
| CRP ≥ 2.9   | 57 | 40 | 26 | 12 | 3 | 1 |

Supplement: s1 [file s1]
